# Supplementary material
Source: ML conference proceedings conference paper supplement (https://openreview.net/forum?id=tKu7NNu0Yq)
Supplement: supplementary_material [file attachment]

## A OPTIMAL TRANSPORT AND WASSERSTEIN DISTANCES

The Wasserstein- $p$  metric between two probability distributions  $\mu_X$  and  $\nu_Y$  is defined as,

$$W_p(\mu, \nu) = \left( \inf_{\gamma \in \Gamma(\mu, \nu)} \mathbf{E}_{(x,y) \sim \gamma} \|x - y\|_p \right)^{1/p}, \quad (12)$$

where  $\Gamma(\mu, \nu)$  are all possible joint distributions where  $X, Y \in \mathcal{D}$ ,  $(\mathcal{D}, d)$  defines a metric space (here,  $d = \|x - y\|_p$ ) and marginals satisfy  $\int_{\mathcal{D}} \gamma(x, y) dy = \mu(x)$  and  $\int_{\mathcal{D}} \gamma(x, y) dx = \nu(y)$ . Note that, while the distance is useful in itself, the optimal transport plan  $\gamma^*$  is also interesting for some applications.

Given samples from  $\mu$  and  $\nu$ ,  $W_p(\mu, \nu)$  can be computed by solving the optimal transport problem,

$$\gamma^* = \operatorname{argmin}_{\gamma \in \mathbb{R}_+^{m \times n}} \sum_{i,j} \gamma_{i,j} M_{i,j} \quad (13)$$

$$\text{s.t. } \gamma \mathbf{1} = [\hat{\mu}]_m; \gamma^T \mathbf{1} = [\hat{\nu}]_n; \gamma \geq 0 \quad (14)$$

where  $[\hat{\mu}]_m$  and  $[\hat{\nu}]_n$  represent binned histograms derived from samples from  $\mu$  and  $\nu$  with  $m$  and  $n$  bins respectively.  $M$  is a  $m \times n$  distance or cost matrix,  $M_{i,j}$  represents the cost  $d(x, y)$  to transport mass from bin  $[\hat{\mu}]_m^i$  to bin  $[\hat{\nu}]_n^j$ .

It is also possible to avoid binning and compute the Wasserstein distance directly from samples. The problem can then be formulated as,

$$\gamma^* = \operatorname{argmin}_{\gamma \in \mathbb{R}_+^{n \times n}} \sum_{i,j} \gamma_{i,j} M_{i,j} \quad (15)$$

$$\text{s.t. } \gamma \mathbf{1} = \mathbf{1}; \gamma^T \mathbf{1} = \mathbf{1}; \gamma \in \{0, 1\} \quad (16)$$

where  $M_{i,j}$  now represents the cost of transporting point  $x_i$  to  $y_j$ . Each point is considered to be sampled i.i.d. from their respective distributions. Unlike the previous case, we can no longer transport a quanta of a point or mass i.e. fractional assignment is not meaningful, naturally leading to a bipartiteness constraint. This is exactly same as Eq (1) and the optimal transport plan for the problem is a linear sum assignment problem and can be computed using the hungarian algorithm.

## B DATASETS

We train and evaluate on *Syn2D*, ShapeNet and ModelNet40 datasets.

**Syn2D.** We generate 2D synthetic point clouds by uniformly sampling 200 points on simple 2D shapes of circles and squares. The circles are generated by uniformly sampling the center and radius from  $(0, 1]$ . For the squares, we sample its center, rotation and scale uniformly from  $[-0.5, 0.5]$ ,  $[0, \frac{\pi}{2}]$ , and  $[0.5, 1]$ , respectively. We refer to the synthetic dataset as *Syn2D* (Fig. 2).

**ShapeNet.** ShapeNet (Chang et al. (2015)) is a richly-annotated, large-scale dataset of 3D shapes. We train and evaluate our models using point clouds from one of the three categories in the ShapeNet dataset: airplane, chair, and car. We sample 1024 points from the ShapeNet point clouds for training and evaluate on a range of point cloud sizes.

**ModelNet40.** (Chang et al. (2015)) introduced the ModelNet project to provide a comprehensive and clean collection of 3D CAD models for objects, compiled using a list of the most common object categories. In our experiments, we evaluate our models trained with a single ShapeNet category on the ModelNet40 dataset. ModelNet40 has 40 different categories.

**ScanObjectNN.** (Uy et al. (2019)) proposed the ScanObjectNN dataset, a real-world point cloud object dataset based on scanned indoor scene data, in order to provide a more realistic benchmark as compared to ModelNet40. In our experiments, we evaluate our models trained with a single ShapeNet category on pairs of point clouds derived from the training set of ScanObjectNN dataset.

Table 3 provides a summary and statistics about of the datasets.

Table 3: Summary of datasets. The top five rows show statistics about the original point cloud datasets, while the bottom four rows show statistics about the pair point cloud dataset that was used for our evaluation and/or training.

|                      | SYN2D | MODELNET40 | SCANOBJECTNN | SHAPENET | AIRPLANE | CAR      | CHAIR    |
|----------------------|-------|------------|--------------|----------|----------|----------|----------|
| # CATEGORIES         | 2     | 40         | 15           | 55       | 1        | 1        | 1        |
| FEATURE DIM          | 2     | 3          | 3            | 3        | 3        | 3        | 3        |
| CARDINALITY          | 200   | 2048       | 2048         | 15000    | 15000    | 15000    | 15000    |
| # TRAIN SAMPLES      | 8000  | 9840       | 2309         | 35708    | 2832     | 2458     | 4612     |
| # VAL SAMPLES        | 2000  | 2468       | 581          | 5158     | 405      | 352      | 662      |
| # TRAIN PAIR SAMPLES | 20000 | -          | -            | -        | 10000    | 10000    | 10000    |
| TRAIN CARDINALITY    | 200   | -          | -            | -        | 1024     | 1024     | 1024     |
| # VAL PAIR SAMPLES   | 5000  | 2000       | 10000        | -        | 2000     | 2000     | 2000     |
| VAL CARDINALITY      | 200   | 1024       | 1024         | -        | 256-8192 | 256-8192 | 256-8192 |

Further, we build pairs  $(U, V)$  of point clouds by randomly sampling pairs from the train or validation splits of point clouds datasets summarized in Table . We refer the first argument in the pair  $U$  as the *source* and the second argument  $V$  as *target*.

### B.1 AUGMENTATIONS

In order to improve generalization, we augment the datasets with point cloud pairs. We randomly sample a point cloud pair  $(U, V)$  from the dataset and another noisy point cloud  $N$  by randomly sampling points from  $\mathcal{N}(0, 1)$  and scaling the whole point cloud by  $\sigma \sim \mathcal{U}(0.1, 1.1)$ . Further, we augment the point cloud pairs according to the following schemes:

- $(U, V)$  : the originally sampled pair.
- $(U, N)$  : target is replaced by the noisy point cloud.
- $(U, U + N)$  : target is a corrupted version of  $U$  with additive noise  $N$ .
- $(U, \tilde{U} + N)$  :  $\tilde{U}$  denotes a point cloud which is similar to  $U$ . For *Syn2D*, we perturb the surface parameters (radius, scale, center, etc.) used for sampling  $U$  and sample points on the perturbed surface. For ShapeNet, we independently sample different set of points from the original surface.
- $(U, V + N)$  : target is a corrupted version of a randomly sampled point cloud from the dataset.

The resulting dataset constitutes 20% samples from each of the above splits. Validation splits are generated randomly and independently for *Syn2D*, while for ShapeNet and ModelNet40, we use the validation split provided. We also augment the validation split with the same scheme as discussed above. The specifics of the pair point-cloud dataset is summarized in Table 3.

## C MODELS

**Transformers.** Let  $X = [x_1, \dots, x_m] \in \mathbb{R}^{m \times d_{\text{model}}}$  be the input sequence (or set) of  $m$  vectors. A transformer layer performs the following computation Vaswani et al. (2017) :

$$\begin{aligned} X' &= \text{LN}(X + \text{Multihead}(X)) \\ t_l(X) &= \text{LN}(X' + \text{FFN}(X')) \end{aligned}$$

where LN and FFN stand for layer norm and feed-forward network, respectively. Multihead denotes a multi-head attention layer which allows the model to jointly attend to information from different representation subspaces at different positions. It consists of a stack of  $H$  scaled dot-product attention layers and computes key, query and value matrices, followed by a softmax as follows :

$$\begin{aligned} K_h &= XW_h^K, \quad Q_h = XW_h^Q, \quad V_h = XW_h^V \\ A_h &= \text{soft-max} \left( \frac{Q_h K_h^\top}{d_k} \right) V_h \\ \text{MultiHead}(X) &= \bar{A} = \text{concat}(A_1, \dots, A_H) W_O \end{aligned}$$

The final output of the encoder can be written as a composition:

$$t(X) = t_N(t_{N-1}(\dots(t_1(X))))$$

**MLP.** The baseline MLP model predicts directly the distance and it does not use the matching information. It has about 110K parameters in total. The point-wise MLP backbone  $g(\cdot)$  is composed of three hidden layer of sizes 4, 8 and 16, with ReLU non-linearity. It outputs a single embedding of dimension 128 for each point cloud after aggregating the point level features. The embedding of the point clouds are then concatenated and passed to the prediction head which is also an MLP with four hidden layers of sizes 256, 128, 64 and 16, and outputs a single scalar which is interpreted as the predicted distance.

**DeepEMD.** We use a transformer encoder backbone which transforms the raw input point clouds into contextualized point level features. The transformer encoder is followed by the output layer which computes the queries and keys and finally the attention matrix which is interpreted as the matching as explained in § 3.2. The model constitutes about 803K learnable paramters, with 8 transformer encoder layers, each with 6 heads. The latent dimensions ( $d_{\text{model}}$ ,  $d_{\text{keys}}$ , etc.) for each layer were all set to 78.

We use the ADAM optimizer with a constant learning rate of 0.001 for DeepEMD and 0.0001 for the MLP.

## D SINKHORN DISTANCE

The Sinkhorn distance [Cuturi \(2013\)](#) considers a regularized OT optimization problem :

$$\begin{aligned} \gamma^* &= \underset{\gamma \in \mathbb{R}_+^{m \times n}}{\operatorname{argmin}} \sum_{i,j} \gamma_{i,j} M_{i,j} + \lambda \Omega(\gamma) \\ \text{s.t. } \gamma 1 &= [\hat{\mu}]_m; \gamma^T 1 = [\hat{\nu}]_n; \gamma \geq 0 \end{aligned}$$

where  $\lambda$  is the regularization coefficient and  $\Omega(\gamma) = \sum_{i,j} \gamma_{i,j} \log(\gamma_{i,j})$  is a entropy regularization term which makes the optimization problem smooth and strictly convex allowing for optimization procedures such as the Sinkhorn-Knopp algorithm. In this paper, we use the Python Optimal Transport (POT) python library [Flamary et al. \(2021\)](#) for computing the Sinkhorn distances. It is an iterative algorithm and can be evaluated in  $O(N^2)$  time complexity.

In our experiments, we used a regularization multiplier of 0.1. Reducing the multiplier typically resulted in numerical issues for a larger portion of the samples, whereas increasing it led to greater inaccuracies in estimation with the same computation time (for a fixed number of iterations). We show the performance metrics with different regularisation parameters in Table [4](#).

Table 4: Effect of regularization parameter on Sinkhorn’s algorithm (100 iterations). Results on ScanObjectNN dataset with 10000 samples. The second row shows number of instances which had numerical issues.

| $\lambda$         | 0.08  | 0.1    | 0.12  | 0.14  |
|-------------------|-------|--------|-------|-------|
| # FAIL            | 686   | 80     | 6     | 0     |
| $r$               | 0.616 | 0.929  | 0.993 | 0.999 |
| $\rho$            | 0.708 | 0.965  | 0.997 | 0.999 |
| $\tau$            | 0.785 | 0.968  | 0.988 | 0.986 |
| RE <sub>0.1</sub> | 0.033 | 0.038  | 0.045 | 0.052 |
| RE <sub>0.5</sub> | 0.068 | 0.078  | 0.093 | 0.110 |
| RE <sub>0.9</sub> | 0.288 | 0.244  | 0.166 | 0.342 |
| CS <sub>0.1</sub> | 0.815 | 0.879  | 0.869 | 0.851 |
| CS <sub>0.5</sub> | 0.991 | 0.992  | 0.991 | 0.989 |
| CS <sub>0.9</sub> | 0.999 | 1.0    | 0.999 | 0.999 |
| ACCURACY          | 21.29 | 20.049 | 18.49 | 17.22 |
| B                 | 20.72 | 19.439 | 18.09 | 17.03 |
| B <sub>corr</sub> | 10.97 | 9.961  | 8.98  | 8.23  |

The difficulty of choosing the regularisation parameter also makes it difficult for training generative models with Sinkhorn as it often leads to numerical issues. We experimented with several variants

of Sinkhorn, including log-space Sinkhorn, log-stabilized Sinkhorn, Greenkhorn, etc. However, we discovered that they either exhibited significantly slower performance compared to the vanilla variant, frequently failed to converge to a satisfactory optimal transport matrix within a finite timeframe, or sometimes exhibited both issues.

## E EXTENDED RESULTS

### E.1 DISTANCE AND MATCHING ESTIMATION

We compare performance of different models and metrics in Table 5. The models were trained on a single ShapeNet category and evaluated on the validation split of the same category. The numbers are averaged over all training categories as well as four training seeds.

Table 5: Performance comparison of different metrics and models. The models are trained on a single ShapeNet category and evaluated on the test split of the same category. The reported numbers are averaged over all categories and four training seeds. The first six rows show distance estimation metrics (see § 4.2), while the last six rows correspond to matching estimation metrics. The arrows next to the metrics indicate whether higher ( $\uparrow$ ) or lower ( $\downarrow$ ) values are better. Chamfer and Sinkhorn are deterministic, thus variances are not reported. Further, our MLP model does not provide accuracy and bipartiteness metrics.

| MODEL                       | CHAMFER | SINKHORN | MLP (OURS)                          | DEEPEMD (OURS)                       |
|-----------------------------|---------|----------|-------------------------------------|--------------------------------------|
| $r$ ( $\uparrow$ )          | 0.963   | 0.995    | $0.998 \pm 0.0$                     | <b><math>1.0 \pm 0.0</math></b>      |
| $\rho$ ( $\uparrow$ )       | 0.953   | 0.997    | $0.998 \pm 0.001$                   | <b><math>1.0 \pm 0.0</math></b>      |
| $\tau$ ( $\uparrow$ )       | 0.827   | 0.987    | $0.966 \pm 0.003$                   | <b><math>0.988 \pm 0.001</math></b>  |
| $RE_{0.1}$ ( $\downarrow$ ) | 0.023   | 0.051    | <b><math>0.002 \pm 0.0</math></b>   | $0.007 \pm 0.003$                    |
| $RE_{0.5}$ ( $\downarrow$ ) | 0.109   | 0.106    | <b><math>0.015 \pm 0.001</math></b> | $0.017 \pm 0.005$                    |
| $RE_{0.9}$ ( $\downarrow$ ) | 0.31    | 0.271    | $0.076 \pm 0.006$                   | <b><math>0.032 \pm 0.005</math></b>  |
| $CS_{0.1}$ ( $\uparrow$ )   | -0.173  | 0.831    | $-0.034 \pm 0.049$                  | <b><math>0.964 \pm 0.001</math></b>  |
| $CS_{0.5}$ ( $\uparrow$ )   | 0.85    | 0.986    | $0.798 \pm 0.018$                   | <b><math>1.0 \pm 0.0</math></b>      |
| $CS_{0.9}$ ( $\uparrow$ )   | 0.998   | 0.999    | $0.974 \pm 0.003$                   | <b><math>1.0 \pm 0.0</math></b>      |
| ACCURACY ( $\uparrow$ )     | 11.677  | 28.407   | -                                   | <b><math>64.648 \pm 0.404</math></b> |
| B ( $\uparrow$ )            | 17.784  | 31.889   | -                                   | <b><math>75.896 \pm 0.521</math></b> |
| $B_{corr}$ ( $\uparrow$ )   | 5.626   | 16.658   | -                                   | <b><math>55.719 \pm 0.568</math></b> |

Tables 6 and 7 show the per-category performance comparison, averaged over four training seeds.

Table 6: Per-category distance estimation performance measures of different models and metrics when train and test category are same. The reported number are averaged over four training seeds.

| TRAIN_CAT | MODEL/METRIC | $r$                                   | $\rho$                                | $\tau$                                | $RE_{0.1}$                            | $RE_{0.5}$                            | $RE_{0.9}$                            |
|-----------|--------------|---------------------------------------|---------------------------------------|---------------------------------------|---------------------------------------|---------------------------------------|---------------------------------------|
| AIRPLANE  | CHAMFER      | 0.9797                                | 0.9647                                | 0.8519                                | 0.0141                                | 0.0962                                | 0.3018                                |
|           | DEEPEMD      | <b><math>0.9998 \pm 0.0</math></b>    | <b><math>0.9997 \pm 0.0</math></b>    | $0.9879 \pm 0.001$                    | $0.0039 \pm 0.0014$                   | $0.0142 \pm 0.0031$                   | <b><math>0.0306 \pm 0.004</math></b>  |
|           | MLP          | $0.9992 \pm 0.0001$                   | $0.9986 \pm 0.0001$                   | $0.9722 \pm 0.0018$                   | <b><math>0.002 \pm 0.0003</math></b>  | <b><math>0.0125 \pm 0.0018</math></b> | $0.0772 \pm 0.0038$                   |
|           | SINKHORN     | 0.9998                                | 0.9997                                | <b><math>0.9881</math></b>            | 0.0496                                | 0.1104                                | 0.2984                                |
| CAR       | CHAMFER      | 0.9675                                | 0.9564                                | 0.8318                                | 0.035                                 | 0.1167                                | 0.324                                 |
|           | DEEPEMD      | <b><math>0.9997 \pm 0.0001</math></b> | <b><math>0.9998 \pm 0.0</math></b>    | <b><math>0.9891 \pm 0.0006</math></b> | $0.006 \pm 0.0047$                    | $0.0156 \pm 0.0068$                   | <b><math>0.0302 \pm 0.0097</math></b> |
|           | MLP          | $0.9993 \pm 0.0002$                   | $0.9988 \pm 0.0004$                   | $0.9746 \pm 0.0035$                   | <b><math>0.0018 \pm 0.0002</math></b> | <b><math>0.0112 \pm 0.001</math></b>  | $0.0625 \pm 0.012$                    |
|           | SINKHORN     | 0.991                                 | 0.9941                                | 0.9854                                | 0.0531                                | 0.1124                                | 0.2986                                |
| CHAIR     | CHAMFER      | 0.9431                                | 0.9382                                | 0.7976                                | 0.0192                                | 0.1133                                | 0.3037                                |
|           | DEEPEMD      | <b><math>0.9997 \pm 0.0</math></b>    | <b><math>0.9997 \pm 0.0001</math></b> | $0.9866 \pm 0.0013$                   | $0.0103 \pm 0.0088$                   | $0.0225 \pm 0.0118$                   | <b><math>0.0356 \pm 0.012</math></b>  |
|           | MLP          | $0.9965 \pm 0.0013$                   | $0.9959 \pm 0.0015$                   | $0.9504 \pm 0.0079$                   | <b><math>0.0037 \pm 0.0006</math></b> | <b><math>0.0214 \pm 0.0023</math></b> | $0.0881 \pm 0.0124$                   |
|           | SINKHORN     | 0.9942                                | 0.9969                                | <b><math>0.9886</math></b>            | 0.049                                 | 0.0955                                | 0.2167                                |

### E.2 OUT-OF-DISTRIBUTION GENERALIZATION

Table 8 shows the out-of-distribution generalization performance for our models. The trained model on a particular ShapeNet category is evaluated on the validation split of other ShapeNet categories.



Table 7: Per-category matching estimation performance measures of different models and metrics when train and test category are same. The reported number are averaged over four training seeds.

| TRAIN_CATE | MODEL/METRIC | CS <sub>0.1</sub>          | CS <sub>0.5</sub>    | CS <sub>0.9</sub>    | ACCURACY                    | B                           | B_CORR                      |
|------------|--------------|----------------------------|----------------------|----------------------|-----------------------------|-----------------------------|-----------------------------|
| AIRPLANE   | CHAMFER      | -0.0813                    | 0.8446               | 0.9973               | 10.1768                     | 16.7437                     | 4.7461                      |
|            | DEEPEMD      | <b>0.9643</b> $\pm$ 0.0027 | <b>1.0</b> $\pm$ 0.0 | <b>1.0</b> $\pm$ 0.0 | <b>61.9119</b> $\pm$ 0.9043 | <b>73.3128</b> $\pm$ 1.1746 | <b>52.2082</b> $\pm$ 1.246  |
|            | MLP          | -0.0492 $\pm$ 0.0533       | 0.7766 $\pm$ 0.0263  | 0.9722 $\pm$ 0.003   | -                           | -                           | -                           |
|            | SINKHORN     | 0.8314                     | 0.9871               | 0.9994               | 25.2956                     | 29.018                      | 13.9732                     |
| CAR        | CHAMFER      | -0.246                     | 0.8615               | 1.0                  | 13.7079                     | 20.7186                     | 6.8617                      |
|            | DEEPEMD      | <b>0.9585</b> $\pm$ 0.0025 | <b>1.0</b> $\pm$ 0.0 | <b>1.0</b> $\pm$ 0.0 | <b>67.7243</b> $\pm$ 0.6554 | <b>78.7286</b> $\pm$ 0.797  | <b>59.6723</b> $\pm$ 0.9245 |
|            | MLP          | 0.017 $\pm$ 0.0652         | 0.8388 $\pm$ 0.0187  | 0.9804 $\pm$ 0.0029  | -                           | -                           | -                           |
|            | SINKHORN     | 0.8043                     | 0.9845               | 0.9993               | 31.1621                     | 35.5971                     | 19.3105                     |
| CHAIR      | CHAMFER      | -0.1929                    | 0.8442               | 0.9976               | 11.145                      | 15.8883                     | 5.2694                      |
|            | DEEPEMD      | <b>0.9703</b> $\pm$ 0.0007 | <b>1.0</b> $\pm$ 0.0 | <b>1.0</b> $\pm$ 0.0 | <b>64.3079</b> $\pm$ 0.4712 | <b>75.6459</b> $\pm$ 0.657  | <b>55.2757</b> $\pm$ 0.7011 |
|            | MLP          | -0.0695 $\pm$ 0.1211       | 0.7793 $\pm$ 0.0438  | 0.97 $\pm$ 0.0072    | -                           | -                           | -                           |
|            | SINKHORN     | 0.8558                     | 0.9876               | 0.9992               | 28.7644                     | 31.0521                     | 16.69                       |

The numbers are averaged over these other categories as well as four training seeds. Tables 9 and 10 show the performance in the same setting but for each test category separately.

Table 8: Out-of-distribution (category) generalization for our models and comparison with other metrics (Chamfer and Sinkhorn). The models are trained on a single ShapeNet category and evaluated on other ShapeNet categories. The reported numbers are averaged over these categories as well as four training seeds. The first five rows show distance estimation metrics (see § 4.2), while the last five rows correspond to matching estimation metrics. The arrows next to the metrics indicate whether higher ( $\uparrow$ ) or lower ( $\downarrow$ ) values are better.

| MODEL                              | MLP (OOD)          | MLP                | DEEPEMD (OOD)      | DEEPEMD            |
|------------------------------------|--------------------|--------------------|--------------------|--------------------|
| $r$ ( $\uparrow$ )                 | 0.98 $\pm$ 0.019   | 0.998 $\pm$ 0.001  | 0.999 $\pm$ 0.001  | 1.0 $\pm$ 0.0      |
| $\rho$ ( $\uparrow$ )              | 0.976 $\pm$ 0.02   | 0.998 $\pm$ 0.001  | 0.999 $\pm$ 0.0    | 1.0 $\pm$ 0.0      |
| $\tau$ ( $\uparrow$ )              | 0.886 $\pm$ 0.04   | 0.966 $\pm$ 0.004  | 0.977 $\pm$ 0.003  | 0.988 $\pm$ 0.001  |
| RE <sub>0.1</sub> ( $\downarrow$ ) | 0.014 $\pm$ 0.003  | 0.002 $\pm$ 0.0    | 0.009 $\pm$ 0.009  | 0.007 $\pm$ 0.005  |
| RE <sub>0.5</sub> ( $\downarrow$ ) | 0.065 $\pm$ 0.018  | 0.015 $\pm$ 0.002  | 0.024 $\pm$ 0.012  | 0.017 $\pm$ 0.007  |
| RE <sub>0.9</sub> ( $\downarrow$ ) | 0.319 $\pm$ 0.132  | 0.076 $\pm$ 0.009  | 0.05 $\pm$ 0.011   | 0.032 $\pm$ 0.008  |
| CS <sub>0.1</sub> ( $\uparrow$ )   | -0.208 $\pm$ 0.089 | -0.034 $\pm$ 0.074 | 0.933 $\pm$ 0.004  | 0.964 $\pm$ 0.002  |
| CS <sub>0.5</sub> ( $\uparrow$ )   | 0.714 $\pm$ 0.047  | 0.798 $\pm$ 0.027  | 1.0 $\pm$ 0.0      | 1.0 $\pm$ 0.0      |
| CS <sub>0.9</sub> ( $\uparrow$ )   | 0.963 $\pm$ 0.006  | 0.974 $\pm$ 0.004  | 1.0 $\pm$ 0.0      | 1.0 $\pm$ 0.0      |
| ACCURACY ( $\uparrow$ )            | -                  | -                  | 54.35 $\pm$ 1.16   | 64.648 $\pm$ 0.606 |
| B ( $\uparrow$ )                   | -                  | -                  | 67.922 $\pm$ 1.343 | 75.896 $\pm$ 0.782 |
| B <sub>corr</sub> ( $\uparrow$ )   | -                  | -                  | 44.293 $\pm$ 1.445 | 55.719 $\pm$ 0.851 |

Table 9: Per-category distance estimation performance measures of different models and metrics when train and test category are different. The reported number are averaged over four training seeds.

| TRAIN_CATE | TEST_CATE | $r$                 | $\rho$              | $\tau$              | RE <sub>0.1</sub>   | RE <sub>0.5</sub>   | RE <sub>0.9</sub>   |
|------------|-----------|---------------------|---------------------|---------------------|---------------------|---------------------|---------------------|
| AIRPLANE   | AIRPLANE  | 0.9998 $\pm$ 0.0    | 0.9997 $\pm$ 0.0    | 0.9879 $\pm$ 0.001  | 0.0039 $\pm$ 0.0014 | 0.0142 $\pm$ 0.0031 | 0.0306 $\pm$ 0.004  |
|            | CAR       | 0.9989 $\pm$ 0.0006 | 0.9997 $\pm$ 0.0001 | 0.9864 $\pm$ 0.001  | 0.0035 $\pm$ 0.0005 | 0.016 $\pm$ 0.0036  | 0.0308 $\pm$ 0.0039 |
|            | CHAIR     | 0.9981 $\pm$ 0.0003 | 0.9983 $\pm$ 0.0003 | 0.9689 $\pm$ 0.0016 | 0.0044 $\pm$ 0.0011 | 0.0212 $\pm$ 0.0033 | 0.0491 $\pm$ 0.0048 |
| CAR        | AIRPLANE  | 0.9993 $\pm$ 0.0002 | 0.9989 $\pm$ 0.0003 | 0.9766 $\pm$ 0.0017 | 0.0092 $\pm$ 0.0065 | 0.0256 $\pm$ 0.011  | 0.0634 $\pm$ 0.0114 |
|            | CAR       | 0.9997 $\pm$ 0.0001 | 0.9998 $\pm$ 0.0    | 0.9891 $\pm$ 0.0006 | 0.006 $\pm$ 0.0047  | 0.0156 $\pm$ 0.0068 | 0.0302 $\pm$ 0.0097 |
|            | CHAIR     | 0.9978 $\pm$ 0.0001 | 0.9981 $\pm$ 0.0002 | 0.9671 $\pm$ 0.0017 | 0.0045 $\pm$ 0.0019 | 0.0206 $\pm$ 0.006  | 0.0525 $\pm$ 0.0022 |
| CHAIR      | AIRPLANE  | 0.999 $\pm$ 0.0004  | 0.9983 $\pm$ 0.0008 | 0.9751 $\pm$ 0.0047 | 0.0164 $\pm$ 0.0114 | 0.034 $\pm$ 0.0127  | 0.0631 $\pm$ 0.0092 |
|            | CAR       | 0.9987 $\pm$ 0.0007 | 0.9996 $\pm$ 0.0001 | 0.9867 $\pm$ 0.0007 | 0.0141 $\pm$ 0.0116 | 0.0275 $\pm$ 0.014  | 0.0422 $\pm$ 0.0139 |
|            | CHAIR     | 0.9997 $\pm$ 0.0    | 0.9997 $\pm$ 0.0001 | 0.9866 $\pm$ 0.0013 | 0.0103 $\pm$ 0.0088 | 0.0225 $\pm$ 0.0118 | 0.0356 $\pm$ 0.012  |

### E.3 DEEPEMD AS A LOSS

Fig. 9 shows more samples with the input point cloud and the reconstructed output from SetVAE when trained with EMD, Chamfer or DeepEMD as the reconstruction loss.

Table 10: Per-category matching estimation performance measures of different models and metrics when train and test category are different. The reported number are averaged over four training seeds.

| TRAIN_CATE | TEST_CATE | CS <sub>0.1</sub> |                   |                   | ACCURACY         | B                | B_CORR           |
|------------|-----------|-------------------|-------------------|-------------------|------------------|------------------|------------------|
|            |           | CS <sub>0.1</sub> | CS <sub>0.5</sub> | CS <sub>0.9</sub> |                  |                  |                  |
| AIRPLANE   | AIRPLANE  | 0.9643 ± 0.0027   | 1.0 ± 0.0         | 1.0 ± 0.0         | 61.9119 ± 0.9043 | 73.3128 ± 1.1746 | 52.2082 ± 1.246  |
|            | CAR       | 0.9347 ± 0.004    | 1.0 ± 0.0         | 1.0 ± 0.0         | 61.4086 ± 0.9383 | 72.6142 ± 1.3357 | 51.6545 ± 1.3383 |
|            | CHAIR     | 0.926 ± 0.0045    | 0.9994 ± 0.0001   | 1.0 ± 0.0         | 48.9237 ± 0.9275 | 63.1441 ± 1.0583 | 38.1275 ± 1.1302 |
| CAR        | AIRPLANE  | 0.9279 ± 0.0027   | 0.9997 ± 0.0      | 1.0 ± 0.0         | 50.7472 ± 1.1176 | 66.2 ± 1.0652    | 40.6049 ± 1.3128 |
|            | CAR       | 0.9585 ± 0.0025   | 1.0 ± 0.0         | 1.0 ± 0.0         | 67.7243 ± 0.6554 | 78.7286 ± 0.797  | 59.6723 ± 0.9245 |
|            | CHAIR     | 0.9218 ± 0.0035   | 0.9994 ± 0.0001   | 1.0 ± 0.0         | 47.7712 ± 1.1373 | 63.8324 ± 1.1691 | 37.6786 ± 1.2958 |
| CHAIR      | AIRPLANE  | 0.9401 ± 0.0031   | 0.9998 ± 0.0      | 1.0 ± 0.0         | 53.7969 ± 0.8777 | 67.1421 ± 1.0913 | 43.3759 ± 1.0926 |
|            | CAR       | 0.945 ± 0.0006    | 1.0 ± 0.0         | 1.0 ± 0.0         | 63.4508 ± 0.5761 | 74.5965 ± 0.7858 | 54.3188 ± 0.8313 |
|            | CHAIR     | 0.9703 ± 0.0007   | 1.0 ± 0.0         | 1.0 ± 0.0         | 64.3079 ± 0.4712 | 75.6459 ± 0.657  | 55.2757 ± 0.7011 |

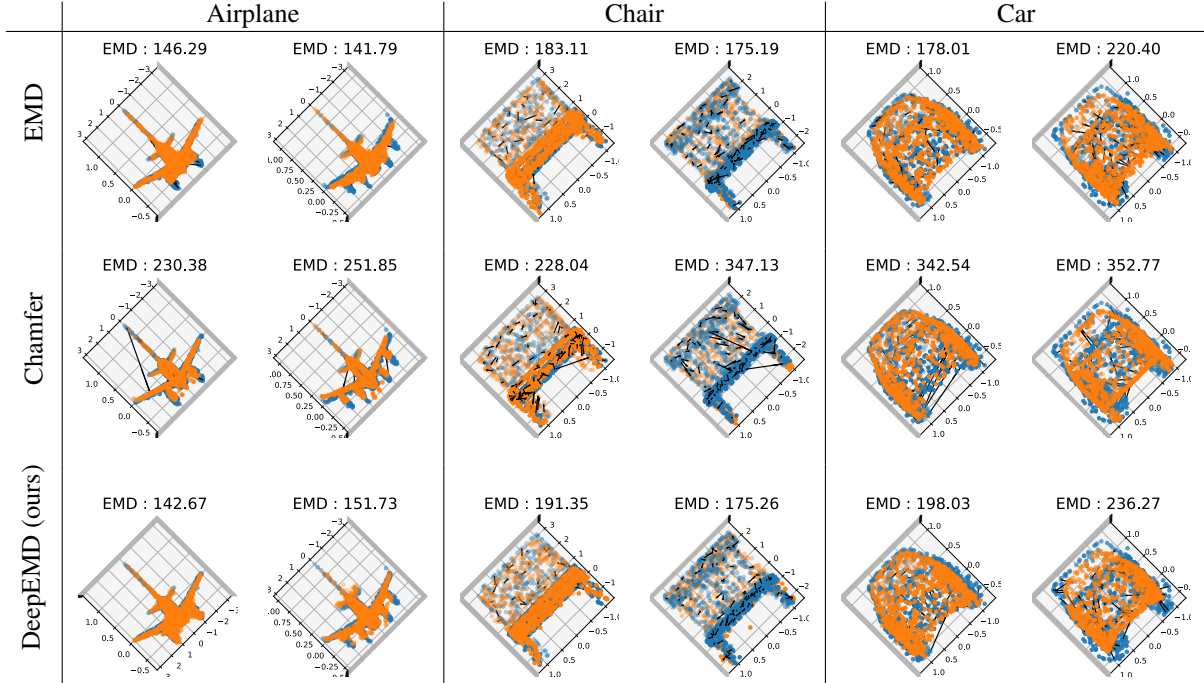

Figure 9: Reconstruction on validation data with SetVAE trained with different reconstruction losses : EMD (top), Chamfer (middle) and DeepEMD surrogate (bottom). Training with DeepEMD as a loss consistently achieves lower reconstruction EMD as compared to Chamfer loss.
